# Supplementary material for: Accumulation of Astaxanthin by a New Haematococcus pluvialis Strain BM1 from the White Sea Coastal Rocks (Russia)
Source: Mar Drugs. 2014 Aug 15;12(8):4504–20. doi: 10.3390/md12084504 (PMC4145328; doi:10.3390/md12084504)

## Supplementary Information

**Table S1.** Representative climatic parameters at the site of sample collection (summer, 2011).

| Month  | Temperature, °C |     |      |           |      |      |           | Relative Humidity, % |      |      |
|--------|-----------------|-----|------|-----------|------|------|-----------|----------------------|------|------|
|        | Air             |     |      | Sea Water |      |      | Rock Bath |                      |      |      |
|        | Avg.            | Min | Max  | Avg.      | Min  | Max  | Max       | Avg.                 | Min  | Max  |
| June   | 13.5            | 4.5 | 30.5 | 10.0      | 4.4  | 14.7 | 31.5      | 69.2                 | 24.5 | 95.5 |
| July   | 16.1            | 6.6 | 25.7 | 14.5      | 8.5  | 16.9 | 40.2      | 75.2                 | 35.1 | 96.4 |
| August | 12.7            | 6.0 | 23.4 | 14.5      | 10.4 | 16.8 | 29.6      | 76.8                 | 34.6 | 95.6 |

**Figure S1.** Typical growth parameters of *H. pluvialis* BM1 “green” cell culture in the bubble column photobioreactor (see the Experimental section and). (a) Dry weight accumulation; (b) Changes in cell density; (c) Dynamics of total carotenoids and (d) chlorophylls.

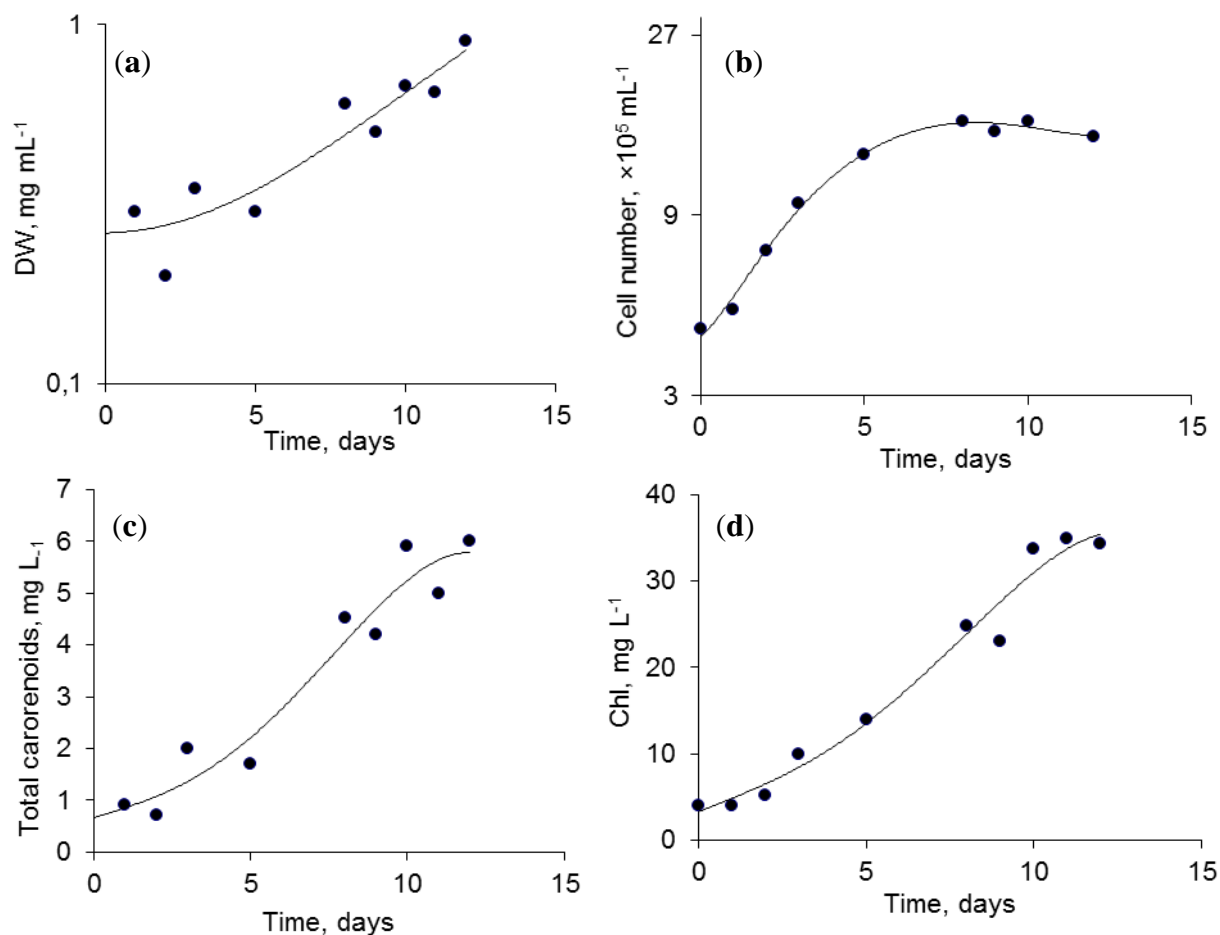

**Figure S2.** (a) The “red” cells of *H. pluvialis* BM1; (b) Absorbance spectra of the pigments extracted with dimethyl sulfoxide from the “green” cells and the “red” cells formed after a two-day stress exposition; (c) Kinetics of astaxanthin accumulation in *H. pluvialis* BM1 cells incubated under the stressful conditions (see the Experimental section); (d) The ‘red’ cells of *H. pluvialis* BM1 in the photobioreactor after a two-day stress exposition.

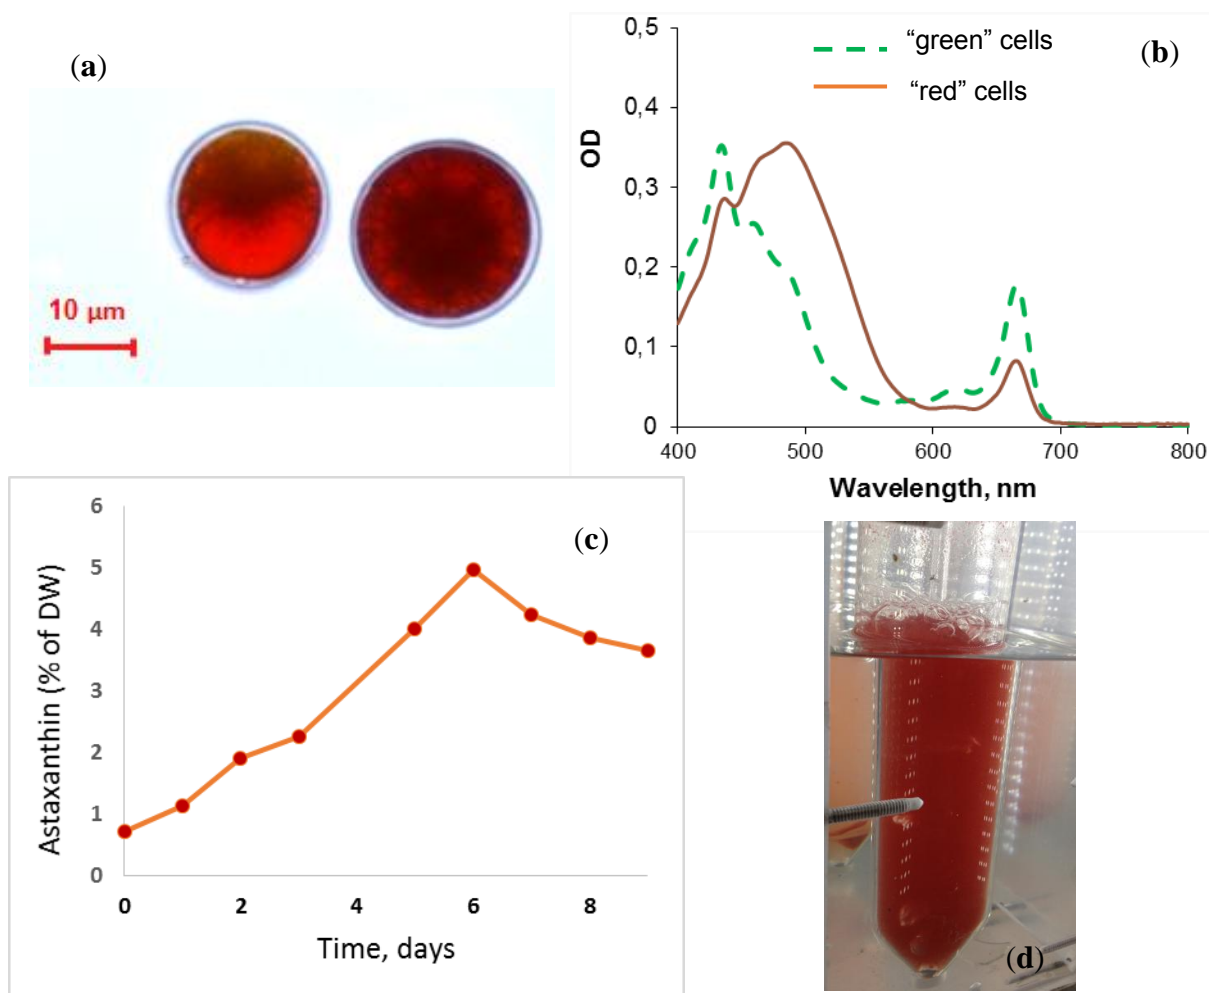

Supplement: Supplementary File 1 [file marinedrugs-12-04504-s001.pdf]
